# Supplementary material for: Calibration of boron isotope ratio measurements by MC-ICP-MS using normalisation to admixed internal standards
Source: Royal Society of Chemistry journal article supplement (doi:10.1039/d0ja00145g), 2020-01-01
Supplement: d0ja00145g1.xlsx [file d0ja00145g1.xlsx]

## Sheet: Sheet1
			R, 13C/12C	b, slope	xmean	ymean
			1.5e-05	0.03	0.000270828	0.00034433
	R, 13C/12C	0.010642	0.010657	0.010642	0.010642	0.010642
	b, slope	1.2691	1.2691	1.2991	1.2691	1.2691
	xmean	-4.43357	-4.43357	-4.43357	-4.4333	-4.43357
	ymean	1.53554	1.53554	1.53554	1.53554	1.53588
	R, 11B/10B	4.04194	4.04917	4.0287	4.04055	4.04333
	R, 11B/10B	4.04194	4.04194	4.04194	4.04194	4.04194
	D	0	0.00723163	-0.0132414	-0.00138901	0.001392
	D2	0	5.22965e-05	0.000175334	1.92934e-06	1.93767e-06
	U2standard	0.000231497
	Ustandard, k = 1	0.015215
	Ustandard, %	0.376429
	Confidence interval , 95%	0.0304301
	Contributions to total uncertainty, %:		22.5906	75.739	0.83342	0.837017
			R, 13C/12C	b, slope	xmean	ymean
			1.5e-05	0.03	0.000270828	0.00034433
	R, 13C/12C	0.010642	0.010657	0.010642	0.010642	0.010642
	b, slope	1.2691	1.2691	1.2991	1.2691	1.2691
	xmean	-4.43357	-4.43357	-4.43357	-4.4333	-4.43357
	ymean	1.53554	1.53554	1.53554	1.53554	1.53588
	R, 11B/10B	4.04194	4.04917	4.0287	4.04055	4.04333
	R, 11B/10B	4.04194	4.04194	4.04194	4.04194	4.04194
	D	0	0.00723163	-0.0132414	-0.00138901	0.001392
	D2	0	5.22965e-05	0.000175334	1.92934e-06	1.93767e-06
	R, C		1	0.05	0.05	0.05
	b, slope		0.05	1	0.99	0.99
	xmean		0.05	0.99	1	0.99
	ymean		0.05	0.99	0.99	1
	R, C		5.22965e-05	-4.78783e-06	-5.0224e-07	5.03322e-07
	b, slope		-4.78783e-06	0.000175334	1.82084e-05	-1.82477e-05
	xmean		-5.0224e-07	1.82084e-05	1.92934e-06	-1.91417e-06
	ymean		5.03322e-07	-1.82477e-05	-1.91417e-06	1.93767e-06
	U2standard	0.000218017
	Ustandard	0.0147654
	Ustandard, %	0.365304
	Confidence interval	0.0295308
